# Supplementary material for: Chimpanzees (Pan troglodytes) Produce the Same Types of ‘Laugh Faces’ when They Emit Laughter and when They Are Silent
Source: PubMed Central journal article supplement (PMC4465483; doi:10.1371/journal.pone.0127337), 2015-06-10
Supplement: pone.0127337.s002.pdf [file pone.0127337.s002.pdf]

| Age group  | sex | Laughter      |                  |                |                   | Silent        |                  |                |                   |
|------------|-----|---------------|------------------|----------------|-------------------|---------------|------------------|----------------|-------------------|
|            |     | rough contact | rough no contact | gentle contact | gentle no contact | rough contact | rough no contact | gentle contact | gentle no contact |
| Adolescent | f   | 0             | 2                | 8              | 5                 | 1             | 1                | 1              | 5                 |
| Juvenile   | f   | 2             | 0                | 2              | 1                 | 4             | 0                | 4              | 5                 |
| Juvenile   | m   | 31            | 5                | 12             | 12                | 22            | 0                | 13             | 18                |
| Juvenile   | m   | 3             | 0                | 2              | 0                 | 0             | 0                | 1              | 0                 |
| Adult      | m   | 12            | 0                | 3              | 1                 | 23            | 0                | 4              | 3                 |
| Adolescent | m   | 9             | 1                | 5              | 7                 | 12            | 1                | 2              | 4                 |
| Juvenile   | m   | 13            | 0                | 1              | 3                 | 51            | 0                | 1              | 1                 |
| Juvenile   | f   | 4             | 0                | 4              | 0                 | 14            | 0                | 3              | 10                |
| Juvenile   | m   | 23            | 4                | 3              | 12                | 4             | 0                | 1              | 0                 |
| Juvenile   | f   | 19            | 0                | 11             | 1                 | 3             | 0                | 3              | 3                 |
| Adolescent | f   | 20            | 0                | 0              | 1                 | 2             | 0                | 0              | 0                 |
| Juvenile   | m   | 3             | 1                | 3              | 0                 | 3             | 0                | 0              | 2                 |
| Juvenile   | f   | 3             | 2                | 3              | 4                 | 17            | 3                | 2              | 7                 |
| Juvenile   | m   | 2             | 0                | 5              | 1                 | 1             | 0                | 0              | 0                 |
| Juvenile   | m   | 49            | 6                | 0              | 4                 | 15            | 1                | 4              | 0                 |
| Juvenile   | f   | 46            | 1                | 25             | 9                 | 20            | 1                | 14             | 17                |
| Juvenile   | f   | 17            | 0                | 12             | 1                 | 7             | 0                | 0              | 2                 |
| Juvenile   | m   | 17            | 0                | 0              | 1                 | 18            | 0                | 7              | 4                 |
| Juvenile   | m   | 5             | 1                | 4              | 0                 | 2             | 1                | 5              | 2                 |
| Juvenile   | m   | 85            | 3                | 12             | 5                 | 44            | 2                | 13             | 10                |
| Infant     | m   | 3             | 0                | 6              | 2                 | 1             | 0                | 2              | 5                 |
| Infant     | f   |               |                  |                |                   | 3             | 0                | 3              | 2                 |
| Infant     | f   | 3             | 0                | 1              | 0                 |               |                  |                |                   |
| Infant     | f   | 1             | 0                | 0              | 1                 | 1             | 0                | 1              | 3                 |
| Infant     | f   | 0             | 1                | 4              | 0                 | 3             | 0                | 3              | 3                 |
| Infant     | m   | 30            | 0                | 3              | 0                 | 35            | 0                | 7              | 3                 |
| Infant     | m   | 7             | 0                | 1              | 0                 | 6             | 0                | 0              | 1                 |
| Infant     | m   | 10            | 0                | 0              | 0                 |               |                  |                |                   |
| Juvenile   | f   | 2             | 0                | 0              | 0                 | 8             | 0                | 1              | 0                 |
| Juvenile   | f   | 1             | 0                | 0              | 0                 | 1             | 0                | 0              | 1                 |
| Juvenile   | f   | 1             | 0                | 2              | 0                 | 1             | 1                | 0              | 0                 |
| Juvenile   | f   | 1             | 0                | 1              | 1                 | 4             | 0                | 0              | 0                 |
| Juvenile   | f   | 0             | 0                | 3              | 0                 | 0             | 0                | 1              | 0                 |
| Juvenile   | m   | 5             | 0                | 1              | 1                 | 0             | 0                | 1              | 0                 |
| Juvenile   | m   | 0             | 0                | 1              | 0                 | 0             | 0                | 1              | 0                 |
| Juvenile   | m   | 0             | 0                | 1              | 0                 | 0             | 0                | 2              | 2                 |
| Adolescent | f   | 4             | 0                | 2              | 1                 | 2             | 0                | 3              | 1                 |
| Adolescent | f   | 0             | 0                | 0              | 1                 | 0             | 0                | 0              | 1                 |
| Adolescent | f   | 4             | 1                | 1              | 0                 | 6             | 0                | 0              | 1                 |
| Adolescent | f   | 1             | 0                | 0              | 0                 | 1             | 1                | 0              | 1                 |
| Adult      | f   | 1             | 0                | 0              | 1                 | 0             | 0                | 0              | 0                 |
| Adult      | f   | 5             | 0                | 0              | 1                 | 2             | 0                | 0              | 0                 |
| Adult      | f   | 0             | 0                | 5              | 0                 |               |                  |                |                   |
| Adult      | m   | 0             | 0                | 1              | 0                 |               |                  |                |                   |
| Adult      | m   |               |                  |                |                   | 4             | 0                | 0              | 0                 |
| Adult      | m   | 2             | 0                | 0              | 0                 |               |                  |                |                   |
